# Supplementary material
Source: PubMed Central journal article supplement (PMC5187709)
Supplement: pnas.1604975113.sd01.pdf [file pnas.1604975113.sd01.pdf]

## Dataset S1: Model Equations

Posterior parameter distributions, used in predictions, can be found in Table S1.

Prior distributions are located in Table S4.

$$\begin{aligned}
 \frac{dS_O}{dt} &= -\mu S_O - \gamma_O S_O N_O - \beta I \frac{S_O}{K} + a_O N_O (1 - v_O + v_O (1 - \epsilon)), \\
 \frac{dS_S}{dt} &= -\mu S_S - \gamma_S N^2 \frac{S_S}{N_S} - \beta I \frac{S_S}{K} + a_S N_S (1 - v_S + v_S (1 - \epsilon)) + \gamma_O S_O N_O \\
 &\quad - \left[ \phi h(f_T) \left\{ 1 - \sigma (1 - \epsilon) \right\} \right] \frac{S_S}{S_S + V_S}, \\
 \frac{dE}{dt} &= -\mu E - \gamma_S N^2 \frac{E}{N} - \sigma E + \beta I \frac{(S_O + S_S + X_S)}{K}, \\
 \frac{dI}{dt} &= -\mu I - \gamma_S N^2 \frac{I}{N} + \sigma E - \alpha I, \\
 \frac{dV_O}{dt} &= -\mu V_O - \gamma_O V_O N_O + a_O N_O \nu_O \epsilon, \\
 \frac{dF_S}{dt} &= -\mu F_S - \gamma_S N^2 \frac{F_S}{N_S} + (1 - \sigma) \phi h(f_T) \epsilon, \\
 \frac{dV_S}{dt} &= -\mu V_S - \gamma_S N^2 \frac{V_S}{N_S} + a_S N_S \nu_S \epsilon + \gamma_O V_O N_O - \left[ \phi h(f_T) \left\{ 1 - \sigma (1 - \epsilon) \right\} \right] \frac{V_S}{S_S + V_S}, \\
 \frac{dM_S}{dt} &= -\mu M_S - \gamma_S N^2 \frac{M_S}{N_S} + \sigma \phi h(f_T) \epsilon, \\
 \frac{dX_S}{dt} &= -\mu X_S - \gamma_S N^2 \frac{X_S}{N_S} + \phi h(f_T) (1 - \sigma) (1 - \epsilon) - \beta I \frac{X_S}{K},
 \end{aligned}$$

where  $a_O$  and  $a_S$  are daily birth rate for owned and stray dogs respectively.  $N_S = S_S + E + I + F_S + V_S + M_S + X_S$  is the stray dog population and  $N_O = S_O + V_O$  is the owned dog population. Given the proportion of dogs which are female ( $\varphi$ ),

$$\begin{aligned}
 a_O &= \rho \lambda \frac{\varphi}{365} \\
 a_S &= \rho \lambda \frac{(\varphi N_S - F_S - X_S)}{365 N_S},
 \end{aligned}$$

and

$$\gamma_O = \frac{(a_O - \mu)}{K_O},$$
$$\gamma_S = \frac{[\frac{(a_S N_S + a_0 N_0)}{N} - \mu]}{K}.$$

We used hill function of the form,

$$h(f_T) = \frac{2}{\left(1 + \frac{f_0 - f_T}{f_0}\right)^m - 1}$$

such that  $f_0$  is the starting population of fertile females,  $f_T$  is the current population of fertile females. The constant  $m$  is set to 28, which hits the target of 90% efficiency when  $f_T = 0.1f_0$ .
